# Supplementary material
Source: MDPI journal article supplement (https://www.mdpi.com/2036-7503/15/1/13)
Supplement: s1 [file s1]

## Supplementary Tables

**Table S1.** Authors' translation of the items included in the questionnaire.

| <b>Section 1. Your personal experience with RSV infections:<br/>during your clinical practice ...</b>                     |                             |
|---------------------------------------------------------------------------------------------------------------------------|-----------------------------|
| Have you previously managed any RSV case?                                                                                 | [YES] [NO][NO ANSWER]       |
| Have you previously diagnosed any RSV case?                                                                               | [YES] [NO][NO ANSWER]       |
| Have previously required any hospitalization for RSV?                                                                     | [YES] [NO][NO ANSWER]       |
| Have you previously required mAb immunoprophylaxis for RSV?                                                               | [YES] [NO][NO ANSWER]       |
| <b>Section 2. At your knowledge (please mark the correct answer)</b>                                                      |                             |
| 1. Nearly all RSV infections occur in infants and children                                                                | [TRUE] [FALSE] [DON'T KNOW] |
| 2. In most cases, infants acquire RSV infections from their parents                                                       | [TRUE] [FALSE] [DON'T KNOW] |
| 3. In most cases, RSV evolves in an uncomplicated influenza-like illness                                                  | [TRUE] [FALSE] [DON'T KNOW] |
| 4. Lower Respiratory Tract Infections from RSV is deprived of specific signs/symptoms                                     | [TRUE] [FALSE] [DON'T KNOW] |
| 5. In Europe, RSV season spans from ...                                                                                   |                             |
| November – March                                                                                                          | [ ]                         |
| October – February                                                                                                        | [ ]                         |
| September – January                                                                                                       | [ ]                         |
| 6. SARS-CoV-2 and RSV have the same means of transmission                                                                 | [TRUE] [FALSE] [DON'T KNOW] |
| 7. Safe and effective vaccines against RSV are commercially available                                                     | [TRUE] [FALSE] [DON'T KNOW] |
| 8. Monoclonal antibodies can be used against RSV only as immunoprophylaxis                                                | [TRUE] [FALSE] [DON'T KNOW] |
| 9. Immunoprophylaxis for RSV should be delivered ...                                                                      |                             |
| ... every two months, during RSV season                                                                                   | [ ]                         |
| ... every month, during RSV season                                                                                        | [ ]                         |
| ... only at the beginning of RSV season                                                                                   | [ ]                         |
| 10. Globally, RSV causes a total ... deaths in children < 1 age                                                           |                             |
| 43,800                                                                                                                    | [ ]                         |
| 430,800                                                                                                                   | [ ]                         |
| Around 1,000,000                                                                                                          | [ ]                         |
| 11. According to available figures, RSV causes every year a total of ... hospitalizations                                 |                             |
| 2 million                                                                                                                 | [ ]                         |
| 10 million                                                                                                                | [ ]                         |
| 22 million                                                                                                                | [ ]                         |
| Don't know                                                                                                                | [ ]                         |
| 12. According to WHO estimated, RSV causes ... of Lower Respiratory Tract Infections                                      |                             |
| ... 40% ...                                                                                                               | [ ]                         |
| ... 60% ...                                                                                                               | [ ]                         |
| ... 75% ...                                                                                                               | [ ]                         |
| 13. RSV infections may cause severe neurological complications                                                            | [TRUE] [FALSE] [DON'T KNOW] |
| 14. RSV has been acknowledged as a risk factor for adult asthma                                                           | [TRUE] [FALSE] [DON'T KNOW] |
| 15. Seroprevalence for RSV reaches 100% before 2nd year of age                                                            | [TRUE] [FALSE] [DON'T KNOW] |
| 16. Maternal antibodies reduce the risk of RSV infections during first 120 days of life                                   | [TRUE] [FALSE] [DON'T KNOW] |
| 17. Hospitalization rate for RSV during the first year of age may reach...                                                |                             |
| 0.5 per 100                                                                                                               | [ ]                         |
| 1 per 100                                                                                                                 | [ ]                         |
| 5 per 100                                                                                                                 | [ ]                         |
| 18. The majority of patients hospitalized for RSV are affected by chronic respiratory disorders and cardiac malformations | [TRUE] [FALSE] [DON'T KNOW] |
| 19. The majority of hospitalizations for RSV occur among pre-term infants                                                 | [TRUE] [FALSE] [DON'T KNOW] |
| 20. According to available recommendations, mAb should be used only in preterm infants                                    | [TRUE] [FALSE] [DON'T KNOW] |
| 21. Around ¾ of all RSV-related deaths occurs in subjects older than 65 year                                              | [TRUE] [FALSE] [DON'T KNOW] |
| 22. During SARS-CoV-2 pandemic, global incidence of RSV infections has decreased                                          | [TRUE] [FALSE] [DON'T KNOW] |

|                                                                                                                                                                            |                             |
|----------------------------------------------------------------------------------------------------------------------------------------------------------------------------|-----------------------------|
| 23. During winter season 2021 has been affected by a RSV epidemic                                                                                                          | [TRUE] [FALSE] [DON'T KNOW] |
| 24. RSV natural infection elicit a long-lasting immunity                                                                                                                   | [TRUE] [FALSE] [DON'T KNOW] |
| 25. Severe complications are more likely in RSV than in Seasonal Influenza infections                                                                                      | [TRUE] [FALSE] [DON'T KNOW] |
| 3. Please rate the following items from “not significant” (1) to “very significant” (5)                                                                                    |                             |
| Ho do you perceive the frequency of RSV infections?                                                                                                                        |                             |
| ... in infants [age 0 to 8 years]                                                                                                                                          | [1] [2] [3] [4] [5]         |
| ... in adults [age 18 to 64 years]                                                                                                                                         | [1] [2] [3] [4] [5]         |
| ... in elderly [age ≥ 65 years]                                                                                                                                            | [1] [2] [3] [4] [5]         |
| Ho do you perceive the severity of RSV infections?                                                                                                                         |                             |
| ... in infants [age 0 to 8 years]                                                                                                                                          | [1] [2] [3] [4] [5]         |
| ... in adults [age 18 to 64 years]                                                                                                                                         | [1] [2] [3] [4] [5]         |
| ... in elderly [age ≥ 65 years]                                                                                                                                            | [1] [2] [3] [4] [5]         |
| 4. Are you favorable towards the implementation of a RSV vaccine in the specific vaccine schedule, if commercially available?<br>(1 = totally disagree; 5 = totally agree) | [1] [2] [3] [4] [5]         |
| 5. Are you favorable towards the implementation of a mAb prophylactic therapy against RSV<br>(1 = totally disagree; 5 = totally agree)                                     | [1] [2] [3] [4] [5]         |
| 6. In the use of mAb against RSV, which aspects are of specific importance, from your point of view? (1 = totally disagree; 5 = totally agree)                             |                             |
| ... avoiding natural infections                                                                                                                                            | [1] [2] [3] [4] [5]         |
| ... avoiding complications (i.e. LRTI)                                                                                                                                     | [1] [2] [3] [4] [5]         |
| 7. Please provide some general information about you                                                                                                                       |                             |
| Year of birth:                                                                                                                                                             | _____                       |
| Year of medical qualification:                                                                                                                                             | _____                       |
| You identify yourself as:                                                                                                                                                  | [Male][Female][No Answer]   |
| Do you work in hospital settings?                                                                                                                                          | [yes] [no] [no answer]      |

Notes: the present questionnaire can be shared and modified by the end user.  
Please cite the present paper.

**Table S2.** Knowledge test: summary of the answers on presented items proposed to the 389 Italian Pediatricians who participated into the present survey on Respiratory Syncytial Virus (RSV) (Cronbach's alpha = 0.701).

| Statement                                                                             | Correct Answer | Total (No./389) |
|---------------------------------------------------------------------------------------|----------------|-----------------|
| Nearly all RSV infections occur in infants and children                               | FALSE          | 247, 63.5%      |
| In most cases, infants acquire RSV infections from their parents                      | FALSE          | 196, 50.1%      |
| In most cases, RSV evolves in an uncomplicated influenza-like illness                 | TRUE           | 329, 84.6%      |
| Lower Respiratory Tract Infections from RSV is deprived of specific signs/symptoms    | TRUE           | 202, 51.9%      |
| In Europe, RSV season spans from ...                                                  |                |                 |
| November – March                                                                      | TRUE           | 239, 61.4%      |
| October – February                                                                    | FALSE          | 90, 23.1%       |
| September – January                                                                   | FALSE          | 46, 11.8%       |
| Don't know                                                                            | -              | 14, 3.6%        |
| SARS-CoV-2 and RSV have the same means of transmission                                | TRUE           | 374, 96.1%      |
| Safe and effective vaccines against RSV are commercially available                    | FALSE          | 306, 78.7%      |
| Monoclonal antibodies can be used against RSV only as immunoprophylaxis               | TRUE           | 170, 43.7%      |
| Immunoprophylaxis for RSV should be delivered ...                                     |                |                 |
| ... every two months, during RSV season                                               | FALSE          | 60, 15.4%       |
| ... every month, during RSV season                                                    | TRUE           | 150, 38.6%      |
| ... only at the beginning of RSV season                                               | FALSE          | 133, 34.2%      |
| Don't know                                                                            | -              | 46, 11.8%       |
| Globally, RSV causes a total ... deaths in children < 1 age                           |                |                 |
| 43,800                                                                                | TRUE           | 198, 50.9%      |
| 430,800                                                                               | FALSE          | 127, 32.6%      |
| Around 1,000,000                                                                      | FALSE          | 25, 6.4%        |
| Don't know                                                                            | -              | 39, 10.0%       |
| According to available figures, RSV causes every year a total of ... hospitalizations |                |                 |
| 2 million                                                                             | TRUE           | 156, 40.1%      |
| 10 million                                                                            | FALSE          | 157, 40.4%      |
| 22 million                                                                            | FALSE          | 46, 11.8%       |
| Don't know                                                                            | -              | 30, 7.7%        |
| According to WHO estimated, RSV causes ... of Lower Respiratory Tract Infections      |                |                 |
| ... 40% ...                                                                           | FALSE          | 180, 46.3%      |
| ... 60% ...                                                                           | TRUE           | 164, 42.2%      |
| ... 75% ...                                                                           | FALSE          | 39, 10.0%       |
| Don't know                                                                            | -              | 6, 1.5%         |
| RSV infections may cause severe neurological complications                            | TRUE           | 274, 70.4%      |
| RSV has been acknowledged as a risk factor for adult asthma                           | TRUE           | 309, 79.4%      |
| Seroprevalence for RSV reaches 100% before 2nd year of age                            | TRUE           | 230, 59.1%      |
| Maternal antibodies reduce the risk of RSV infections during first 120 days of life   | TRUE           | 299, 76.9%      |
| Hospitalization rate for RSV during the first year of age may reach...                |                |                 |
| 0.5 per 100                                                                           | TRUE           | 65, 16.7%       |
| 1 per 100                                                                             | FALSE          | 102, 26.2%      |
| 5 per 100                                                                             | FALSE          | 203, 52.2%      |
| Don't know                                                                            | -              | 19, 4.9%        |

|                                                                                                                       |       |            |
|-----------------------------------------------------------------------------------------------------------------------|-------|------------|
| The majority of patients hospitalized for RSV are affected by chronic respiratory disorders and cardiac malformations | FALSE | 156, 40.1% |
| The majority of hospitalizations for RSV occur among pre-term infants                                                 | FALSE | 99, 25.4%  |
| According to available recommendations, mAb should be used only in preterm infants                                    | TRUE  | 116, 29.8% |
| Around $\frac{3}{4}$ of all RSV-related deaths occurs in subjects older than 65 years                                 | TRUE  | 87, 22.4%  |
| During SARS-CoV-2 pandemic, global incidence of RSV infections has decreased                                          | TRUE  | 252, 64.8% |
| During Winter Season 2021, Italy has been affected by a RSV epidemic                                                  | TRUE  | 285, 73.3% |
| RSV natural infection elicit a long-lasting immunity                                                                  | FALSE | 207, 53.2% |
| Severe complications are more likely in RSV than in Seasonal Influenza infections                                     | TRUE  | 284, 73.0% |

**Table S3.** Characteristics of the 389 Italian Pediatricians (PDL) participating into the present survey on knowledge, attitudes and practices on respiratory syncytial virus (RSV) by working or not in hospital settings.

| Variable                                                         | Working in Hospital Settings |                 | <i>p</i> value |
|------------------------------------------------------------------|------------------------------|-----------------|----------------|
|                                                                  | Yes (No./106, %)             | No (No./283, %) |                |
| Age ≥ 40 years                                                   | 18, 17.0%                    | 152, 53.7%      | < 0.001        |
| Seniority ≥ 10 years                                             | 29, 27.4%                    | 217, 76.7%      | < 0.001        |
| Male Gender                                                      | 38, 35.8%                    | 103, 36.4%      | 0.920          |
| Region of residence                                              |                              |                 | < 0.001        |
| North-Western Italy                                              | 30, 28.3%                    | 39, 13.8%       |                |
| North-Eastern Italy                                              | 28, 26.4%                    | 99, 35.0%       |                |
| Central Italy                                                    | 30, 28.3%                    | 92, 32.5%       |                |
| Southern Italy                                                   | 0, -                         | 35, 12.4%       |                |
| Major Islands                                                    | 18, 17.0%                    | 18, 6.4%        |                |
| Higher Knowledge Status                                          | 52, 49.1%                    | 127, 44.9%      | 0.461          |
| Higher Risk Perception                                           |                              |                 |                |
| Infants                                                          | 20, 18.9%                    | 122, 43.1%      | < 0.001        |
| Adults                                                           | 17, 16.0%                    | 102, 36.0%      | < 0.001        |
| Elderly                                                          | 37, 34.9%                    | 150, 53.0%      | 0.001          |
| Previously managed RSV cases                                     | 79, 74.5%                    | 84, 29.7%       | < 0.001        |
| Previously delivered mAb                                         | 36, 34.0%                    | 20, 7.1%        | < 0.001        |
| Favorable attitude towards mAb                                   | 73, 68.9%                    | 218, 77.0%      | 0.099          |
| Favorable towards implementation of RSV vaccine (when available) | 106, 100%                    | 255, 90.1%      | 0.001          |

**Table S4.** Correlation of relative search volumes (Google Trends™) on Respiratory Syncytial Virus (RSV) with General Knowledge Score (GKS) and Risk Perception Scores (RPS) (Spearman's correlation coefficient).

| Variable                          | GKS                          | RPS infants                   | RPS adults                   | RPS elderly                  |
|-----------------------------------|------------------------------|-------------------------------|------------------------------|------------------------------|
| Relative Search<br>Volumes on RSV | 0.025<br>( <i>p</i> = 0.618) | -0.052<br>( <i>p</i> = 0.307) | 0.034<br>( <i>p</i> = 0.500) | 0.025<br>( <i>p</i> = 0.621) |
